# Supplementary material
Source: Springer Nature journal article supplement (https://www.springermedizin.de/resource/supplementary/13058_2013_3594_MOESM9_ESM.pdf/9703908)

**A** ADHERENT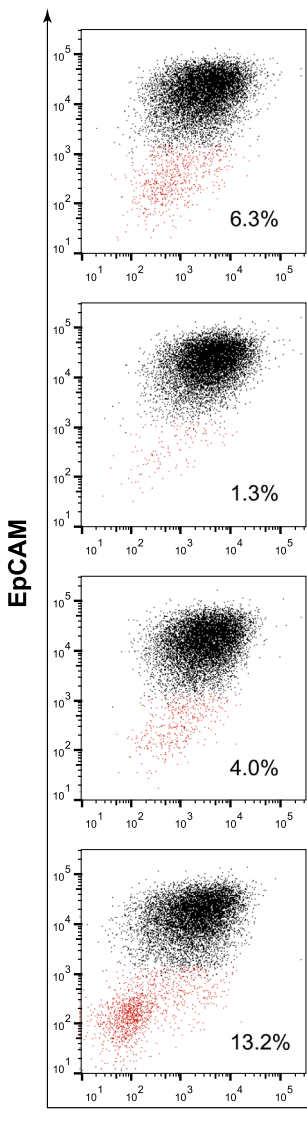**B** MAMMOSPHERE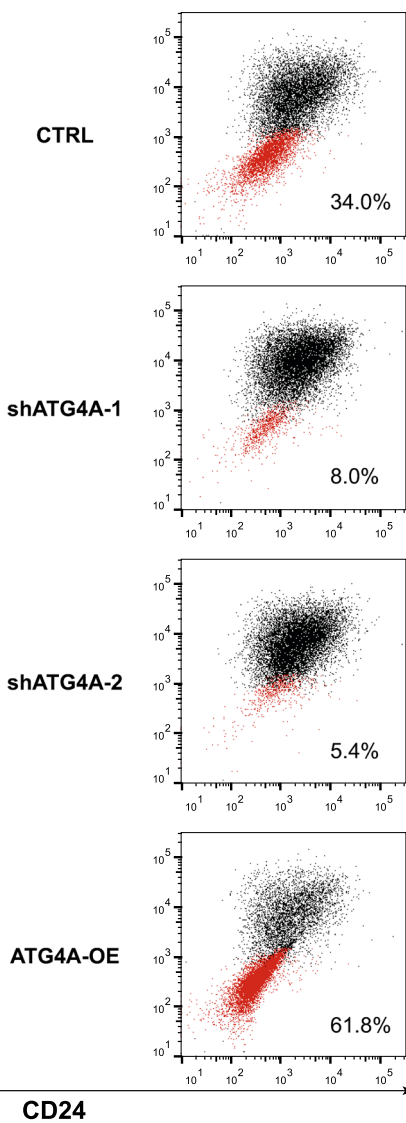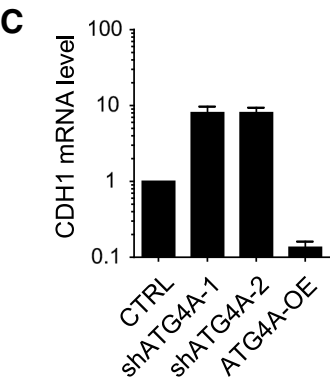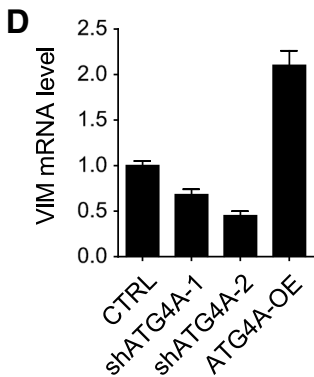

Supplement: MOESM9 [file 9703908]
